# Supplementary material for: A systematically-revised ribosome profiling method for bacteria reveals pauses at single-codon resolution
Source: eLife journal article supplement (doi:10.7554/elife.42591), 2019-02-06
Supplement: supp [file elife-42591-supp-v1.zip]

| Library | Sample_# | Media Treatment | Lysis Buffer | Harvest       | Reference                          | SRA accession number  |
|---------|----------|-----------------|--------------|---------------|------------------------------------|-----------------------|
| L1      | CW63     | Cm              | Cm           | Filter        | This paper                         | Pending               |
| L2      | OL38     | Cm              | Cm           | Filter        | Marks, Mankin, PNAS 2016           | SRR4190324            |
| L3      | OL34     | Cm              | Cm           | Centrifuge    | Latif, Palsson, BioTechniques 2015 | SRR1693437            |
| L4      | OL35     | Cm              | Cm           | Centrifuge    | Latif, Palsson, BioTechniques 2015 | SRR1693438            |
| L5      | OL18     | Cm              | Cm           | Centrifuge    | Liu, Roberts, PNAS 2013            | SRR869826             |
| L6      | OL19     | Cm              | Cm           | Centrifuge    | Liu, Roberts, PNAS 2013            | SRR869827             |
| L7      | OL20     | Cm              | Cm           | Centrifuge    | Liu, Roberts, PNAS 2013            | SRR869828             |
| L8      | OL21     | Cm              | Cm           | Centrifuge    | Liu, Roberts, PNAS 2013            | SRR869829             |
| L9      | OL1      | Cm              | Cm           | Centrifuge    | Oh, Bukau, Cell 2011               | SRR364364             |
| L10     | OL2      | Cm              | Cm           | Centrifuge    | Oh, Bukau, Cell 2011               | SRR364366             |
| L11     | OL24     | none            | Cm           | Filter        | Baggett, Gross, PLOS Genetics 2017 | SRR4421280            |
| L12     | OL25     | none            | Cm           | Filter        | Baggett, Gross, PLOS Genetics 2017 | SRR4421281            |
| L13     | OL26     | none            | Cm           | Filter        | Baggett, Gross, PLOS Genetics 2017 | SRR4421284            |
| L14     | OL27     | none            | Cm           | Filter        | Burkhardt, Gross, eLife 2017       | SRR3147100            |
| L15     | OL28     | none            | Cm           | Filter        | Burkhardt, Gross, eLife 2017       | SRR5186136            |
| L16     | OL29     | none            | Cm           | Filter        | Burkhardt, Gross, eLife 2017       | SRR5186137            |
| L17     | OL30     | none            | Cm           | Filter        | Burkhardt, Gross, eLife 2017       | SRR5186138            |
| L18     | OL12     | none            | Cm           | Filter        | Li, Weissman, Nature 2012          | SRR407274-5 combined  |
| L19     | OL13     | none            | Cm           | Filter        | Li, Weissman, Nature 2012          | SRR407276-7 combined  |
| L20     | OL14     | none            | Cm           | Filter        | Li, Weissman, Cell 2014            | SRR1067765-8 combined |
| L21     | OL36     | none            | Cm           | Filter        | Marks, Mankin, PNAS 2016           | SRR4190326            |
| L22     | OL10     | none            | Cm           | Filter        | Haft, Landick, PNAS 2014           | SRR1211047            |
| L23     | OL11     | none            | Cm           | Filter        | Haft, Landick, PNAS 2014           | SRR1211048            |
| L24     | OL16     | none            | Cm           | Filter        | Subramaniam, O'Shea, Cell 2014     | SRR1301057            |
| L25     | OL17     | none            | Cm           | Filter        | Subramaniam, O'Shea, Cell 2014     | SRR1301059            |
| L26     | CW60     | none            | Cm           | Filter        | Mohammad, Buskirk, Cell Rep 2016   | SRR2340141            |
| L27     | FM22     | none            | 150 mM MgCl2 | Filter        | This Paper                         | Pending               |
| L28     | FM20     | none            | 1 M NaCl     | Filter        | This Paper                         | Pending               |
| L29     | FM85     | none            | 150 mM MgCl2 | Filter        | This Paper                         | Pending               |
| L30     | FM87     | MPC             | 150 mM MgCl2 | Filter        | This Paper                         | Pending               |
| L31     | FM88     | none            | Cm           | Filter        | This Paper                         | Pending               |
| L32     | FM90     | MPC             | Cm           | Filter        | This Paper                         | Pending               |
| L33     | FM91     | none            | 150 mM MgCl2 | Direct Freeze | This Paper                         | Pending               |
| L34     | FM93     | MPC             | 150 mM MgCl2 | Direct Freeze | This Paper                         | Pending               |
| L35     | FM67     | none            | 150 mM MgCl2 | Direct Freeze | This Paper                         | Pending               |
